# Supplementary material for: Rice Husk and Its Biochar Have Contrasting Effects on Water-Soluble Organic Matter and the Microbial Community in a Bamboo Forest Soil
Source: MDPI journal article supplement (doi:10.3390/land11122265), 2022-12-11
Supplement: s1 [file s1]

Archive with 1 entries (1 files):
- land-2009115-supplementary.pdf
